# Supplementary material
Source: MDPI journal article supplement (https://www.mdpi.com/2311-5637/5/3/62)
Supplement: s1 [file s1]

**Figure S1.** Fermentation kinetics of the 10 samples obtained at Harvest 1 (H1) from a) grapes from plants 1-10 of vine row 1 in the young vineyard (YV), b) bark from plants 1-10 of vine row 1 in the young vineyard (YV), c) grapes from plants 11-20 of vine row 2 in the young vineyard (YV), d) bark from plants 11-20 of vine row 2 in the young vineyard (YV), e) grapes from plants 1-10 of vine row 1 in the old vineyard (OV), f) bark from plants 1-10 of vine row 1 in the old vineyard (OV), g) grapes from plants 11-20 of vine row 2 in the old vineyard (OV), h) bark from plants 11-20 of vine row 2 in the old vineyard (OV).

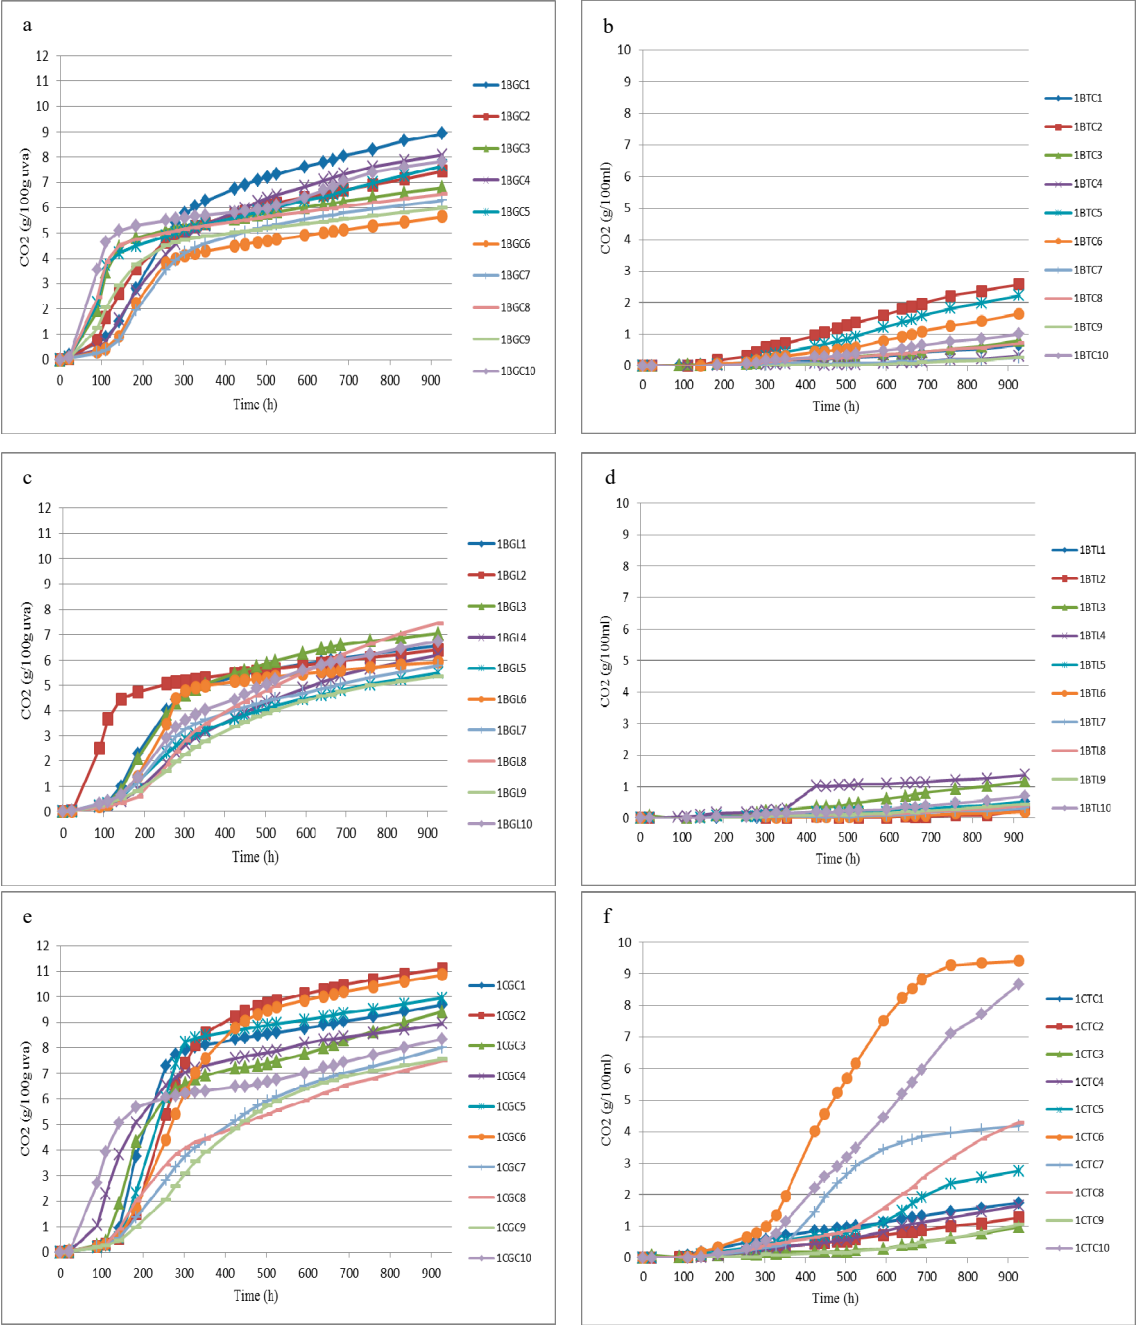

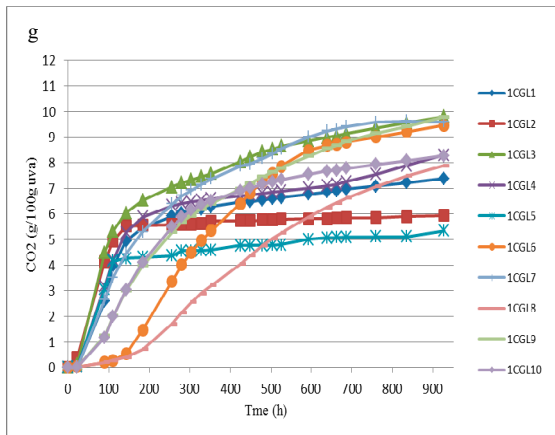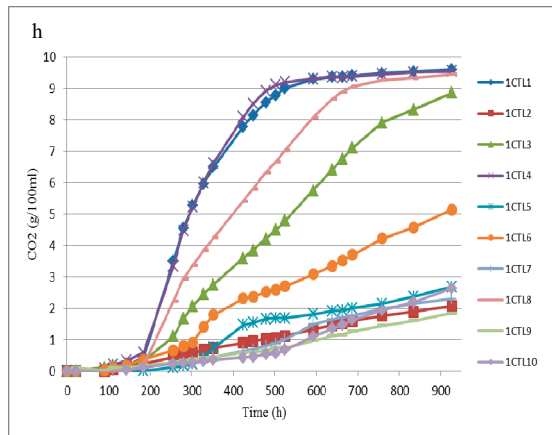

**Figure S2. A.** Fermentation kinetics of the 10 samples obtained at Spring 1 (S 1) from a) bark from plants 1-10 of vine row 1 in the young vineyard (YV), b) bark from plants 11-20 of vine row 2 in the young vineyard (YV), c) bark from plants 1-10 of vine row 1 in the old vineyard (OV), d) bark from plants 11-20 of vine row 2 in the old vineyard (OV). **B.** Fermentation kinetics of the 10 samples obtained at Harvest 2 (H 2) from a) bark from plants 1-10 of vine row 1 in the young vineyard (YV), b) bark from plants 11-20 of vine row 2 in the young vineyard (YV), c) bark from plants 1-10 of vine row 1 in the old vineyard (OV), d) bark from plants 11-20 of vine row 2 in the old vineyard (OV). **C.** Fermentation kinetics of the 10 samples obtained at Early Spring 2 (ES 2) from a) bark from plants 1-10 of vine row 1 in the young vineyard (YV), b) bark from plants 11-20 of vine row 2 in the young vineyard (YV), c) bark from plants 21-30 of vine row 3 in the young vineyard (YV), d) bark from plants 1-10 of vine row 1 in the old vineyard (OV), e) bark from plants 11-20 of vine row 2 in the old vineyard (OV), f) bark from plants 21-30 of vine row 3 in the old vineyard (OV). **D.** Fermentation kinetics of the 10 samples obtained at Late Spring 2 (LS 2) from a) bark from plants 1-10 of vine row 1 in the young vineyard (YV), b) bark from plants 11-20 of vine row 2 in the young vineyard (YV), c) bark from plants 21-30 of vine row 3 in the young vineyard (YV), d) bark from plants 1-10 of vine row 1 in the old vineyard (OV), e) bark from plants 11-20 of vine row 2 in the old vineyard (OV), f) bark from plants 21-30 of vine row 3 in the old vineyard (OV). **E.** Fermentation kinetics of the 10 samples obtained at Harvest 3 (H 3) from a) bark from plants 1-10 of vine row 1 in the young vineyard (YV), b) bark from plants 11-20 of vine row 2 in the young vineyard (YV), c) bark from plants 21-30 of vine row 3 in the young vineyard (YV), d) bark from plants 1-10 of vine row 1 in the old vineyard (OV), e) bark from plants 11-20 of vine row 2 in the old vineyard (OV), f) bark from plants 21-30 of vine row 3 in the old vineyard (OV).

**A.**

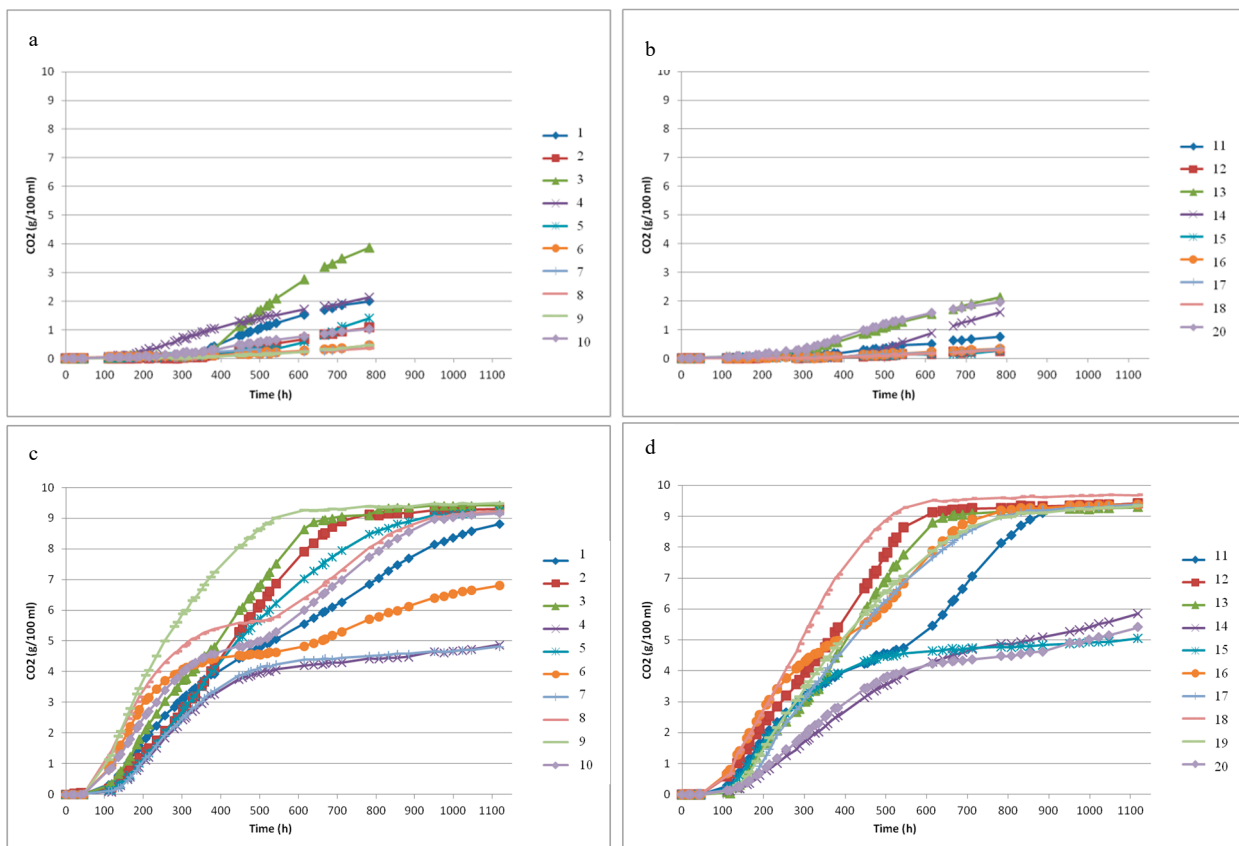

**B.**

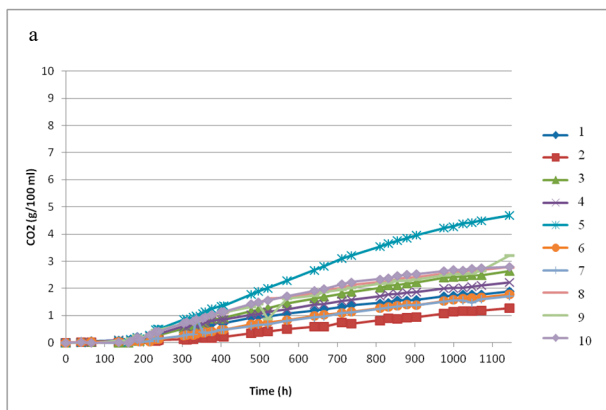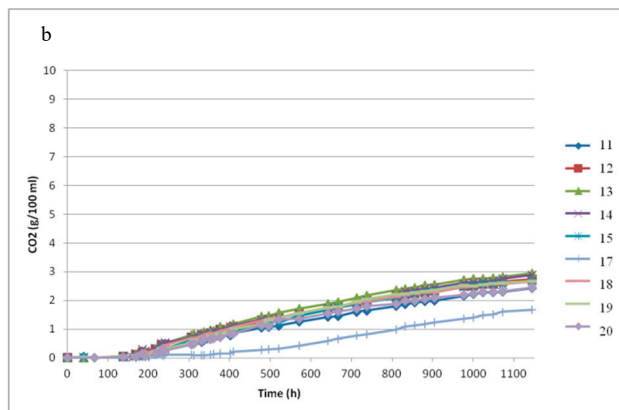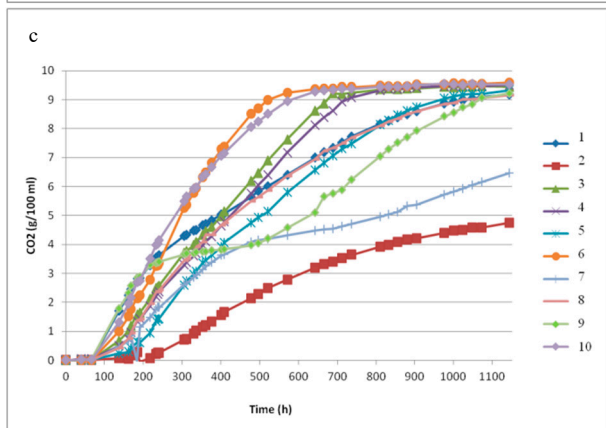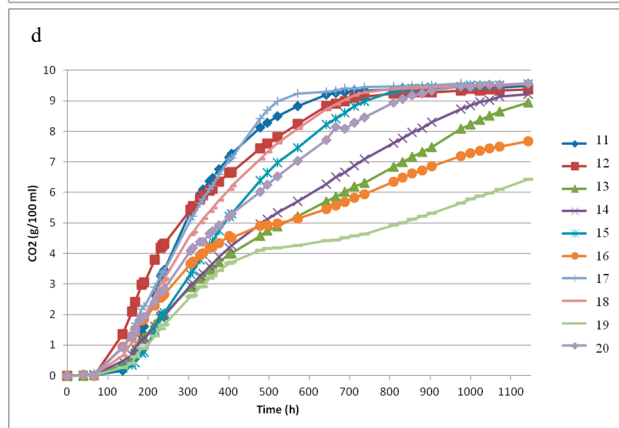

**C.**

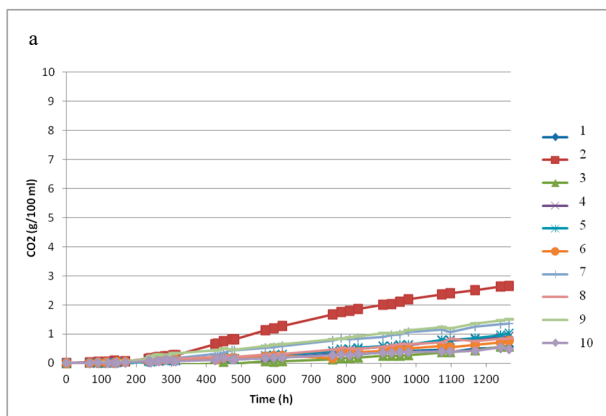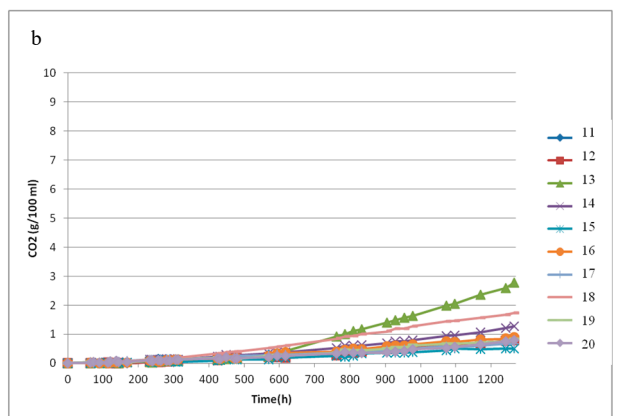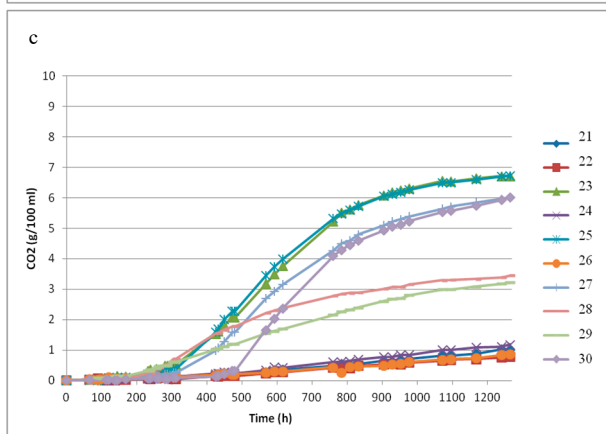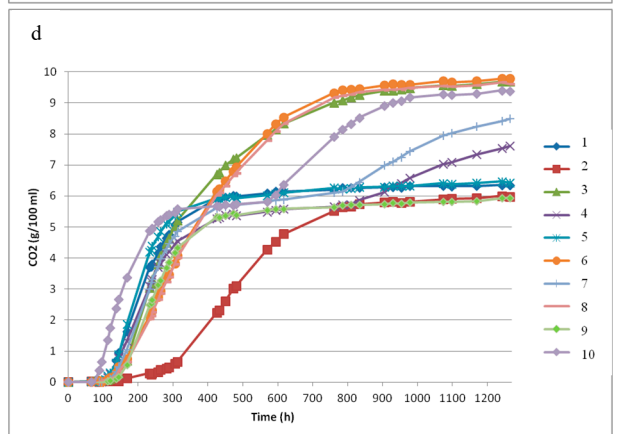

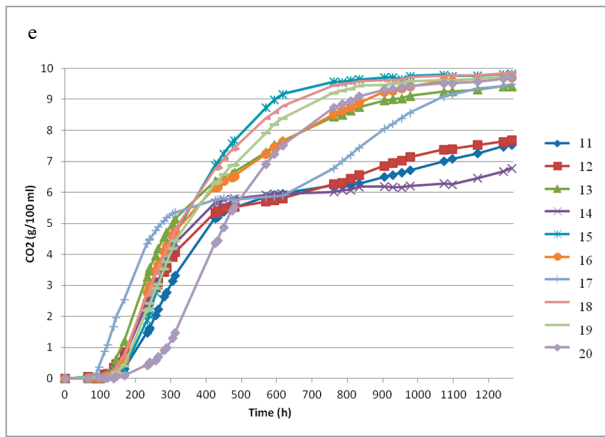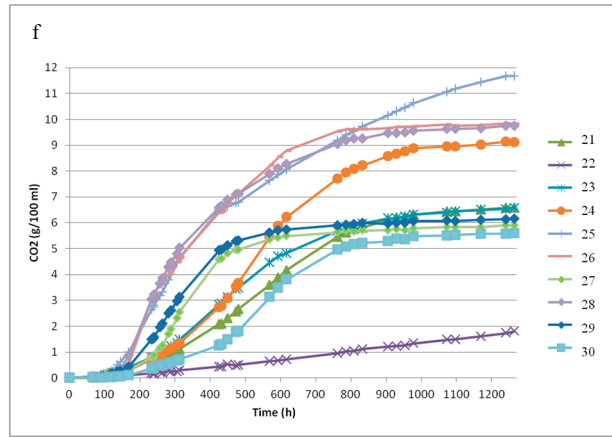

**D.**

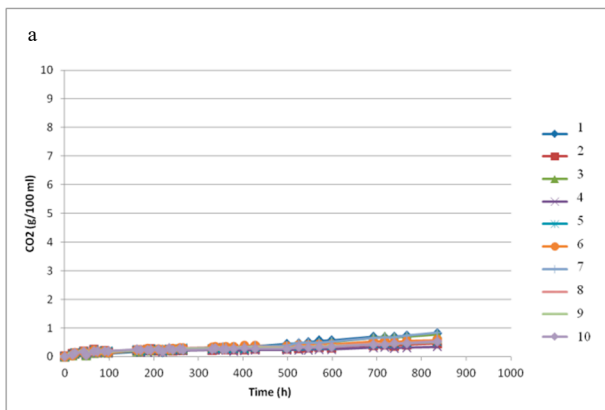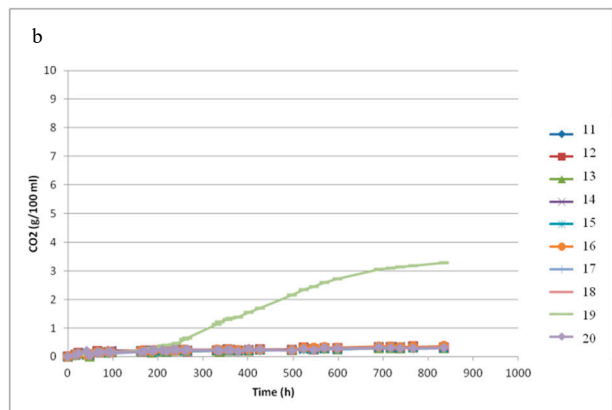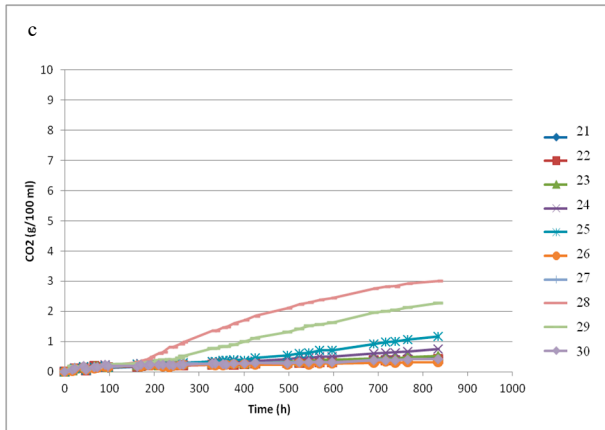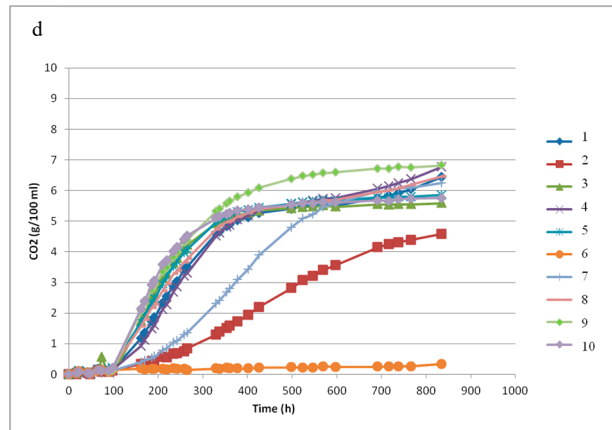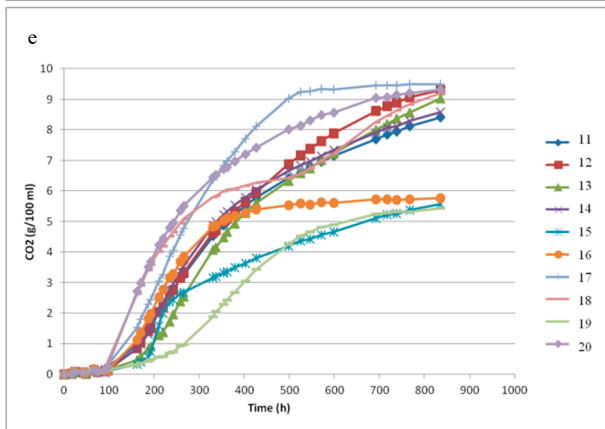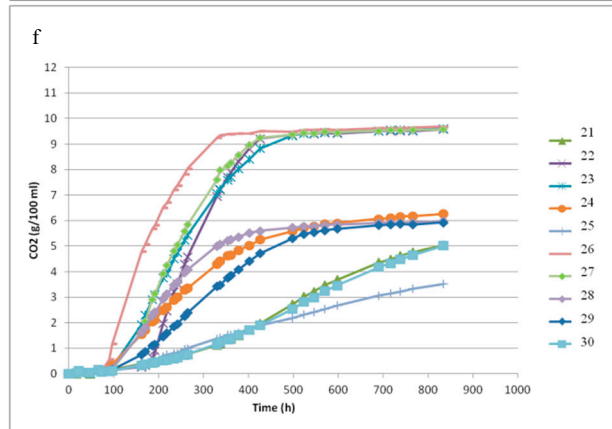

**E.**

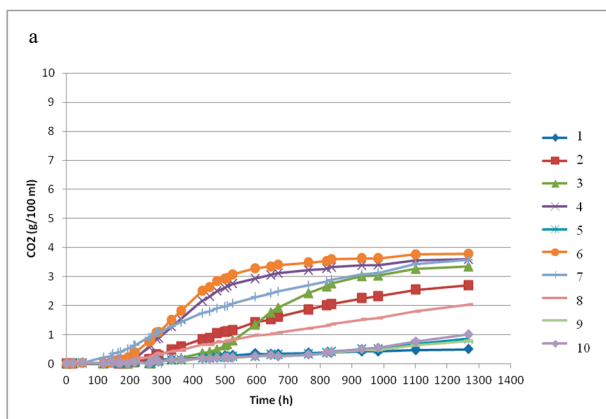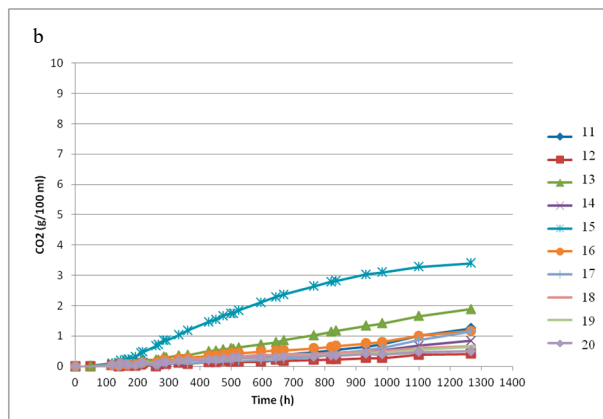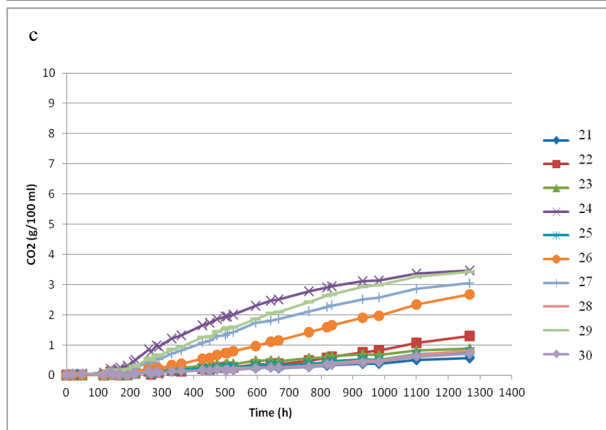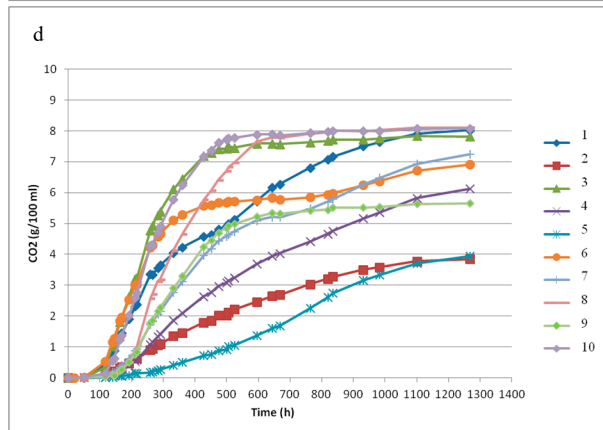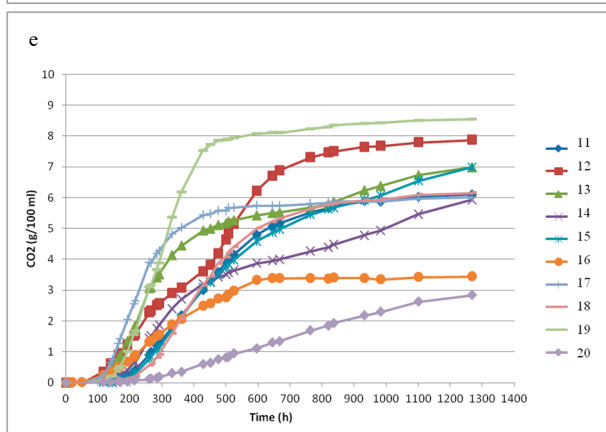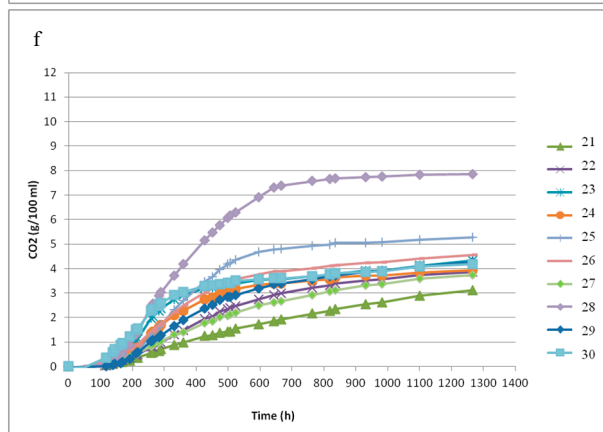

The figure displays a phylogenetic tree on the left and a corresponding presence-absence matrix on the right. The tree is rooted at the bottom and branches upwards, with a scale bar at the top left indicating distances of 60, 80, and 100. The taxa are listed on the right, each preceded by a vertical line indicating its presence in a specific column of the matrix. The taxa are color-coded: T8 (black), P13 (red), F12 (purple), Y1.2 (black), T9 (black), C10.1 (black), T10 (black), Y3.1 (black), T16 (black), T13 (black), F23 (blue), F2 (red), F20 (blue), Y4.1 (black), F24 (blue), P12 (red), C6.1 (black), P8 (green), F27 (purple), T14 (black), F13 (purple), Y1.1 (black), F5 (green), F31 (purple), F21 (blue), P2 (blue), T15 (black), Y4.2 (black), P6 (green), T7 (black), F8 (green), F18 (green), F17 (green), T4 (black), T12 (black), P3 (blue), F26 (blue), F15 (purple), T6 (black), T5 (black), P4 (red), P9 (red), T3 (black), P10 (red), F4 (green), T2 (black), P14 (blue), T18 (black), F30 (purple), F7 (green), F19 (purple), T1 (black), P7 (green), F9 (red), P11 (blue), F25 (blue), G2.2 (black), T17 (black), T11 (black), and P5 (purple).

Y, C and T indicate isolates from vine shoots of the old vineyard (OV); G isolates from grape of old vineyard; F isolates from vinification at sampling time H2 and P isolates from vinification at sampling time H3.
